# Supplementary material for: Functional and Clinical Characterization of Tumor-Infiltrating T Cell Subpopulations in Hepatocellular Carcinoma
Source: Front Genet. 2020 Sep 30;11:586415. doi: 10.3389/fgene.2020.586415 (PMC7561438; doi:10.3389/fgene.2020.586415)
Supplement: Supplementary file 3 [file Table_1.XLSX]

## Sheet: Supplementary Table S1
Table S1. The relative abundance of T cells in TCGA samples
T.cells	TCGA-2V-A95S-01A	TCGA-2Y-A9GS-01A	TCGA-2Y-A9GT-01A	TCGA-2Y-A9GU-01A	TCGA-2Y-A9GV-01A	TCGA-2Y-A9GW-01A	TCGA-2Y-A9GX-01A	TCGA-2Y-A9GY-01A	TCGA-2Y-A9GZ-01A	TCGA-2Y-A9H0-01A	TCGA-2Y-A9H1-01A	TCGA-2Y-A9H2-01A	TCGA-2Y-A9H3-01A	TCGA-2Y-A9H4-01A	TCGA-2Y-A9H5-01A	TCGA-2Y-A9H6-01A	TCGA-2Y-A9H7-01A	TCGA-2Y-A9H8-01A	TCGA-2Y-A9H9-01A	TCGA-2Y-A9HA-01A	TCGA-2Y-A9HB-01A	TCGA-3K-AAZ8-01A	TCGA-4R-AA8I-01A	TCGA-5C-A9VG-01A	TCGA-5C-A9VH-01A	TCGA-5C-AAPD-01A	TCGA-5R-AA1C-01A	TCGA-5R-AA1D-01A	TCGA-5R-AAAM-01A	TCGA-BC-4072-01B	TCGA-BC-4073-01B	TCGA-BC-A10Q-01A	TCGA-BC-A10Q-11A	TCGA-BC-A10R-01A	TCGA-BC-A10R-11A	TCGA-BC-A10S-01A	TCGA-BC-A10T-01A	TCGA-BC-A10T-11A	TCGA-BC-A10U-01A	TCGA-BC-A10U-11A	TCGA-BC-A10W-01A	TCGA-BC-A10W-11A	TCGA-BC-A10X-01A	TCGA-BC-A10X-11A	TCGA-BC-A10Y-01A	TCGA-BC-A10Y-11A	TCGA-BC-A10Z-01A	TCGA-BC-A10Z-11A	TCGA-BC-A110-01A
C1_CD8-LEF1	3.80536	3.69188	3.79014	3.56364	3.66049	3.84695	3.95484	3.74095	3.48388	3.54206	3.69681	3.7246	3.85468	3.59276	3.79926	3.86746	3.72103	3.59868	3.56362	3.5792	3.72048	3.68495	3.53413	3.63439	3.70776	3.70803	3.56842	3.92181	3.86607	3.77344	3.74447	3.76649	3.74516	3.66647	3.86244	3.77305	3.70257	3.84022	3.57706	3.84527	3.64471	3.83509	3.89507	3.85349	3.46416	3.87329	3.37901	3.84223	3.86545
C10_CD4-CXCL13	4.00476	3.63399	3.93226	3.56891	3.64878	3.76996	3.86288	3.90672	3.3312	3.82635	3.68254	3.59832	3.77378	3.50655	3.64256	3.65062	3.49409	3.73914	3.5681	3.48542	3.75664	3.61186	3.57579	3.45336	3.5375	3.85744	3.64065	3.8082	3.65235	3.97074	4.01202	3.64518	3.55865	3.47704	3.7196	3.63069	3.57992	3.63478	3.49517	3.63639	3.77554	3.72233	3.69523	3.65291	3.61494	3.63973	3.34207	3.62329	3.76296
C11_CD4-GNLY	3.59417	3.18338	3.48104	3.05129	3.24907	3.45068	3.48624	3.52277	3.0402	3.18223	3.3182	3.25937	3.5397	3.21331	3.13928	3.31977	3.21754	3.35252	3.14042	3.12356	3.33102	3.20748	3.12912	3.04644	3.08484	3.43656	3.21534	3.44073	3.4745	3.43991	3.58013	3.21544	3.34478	3.15695	3.46211	3.4773	3.33422	3.50481	3.09409	3.3128	3.19658	3.47894	3.41906	3.41222	3.12955	3.51313	2.77493	3.37415	3.51549
C2_CD8-CX3CR1	3.56056	3.33677	3.455	3.14159	3.38167	3.52263	3.51389	3.55063	3.09398	3.20804	3.29641	3.38119	3.51571	3.25551	3.16935	3.38486	3.25998	3.38464	3.21684	3.23281	3.32525	3.16993	3.17956	3.10361	3.16612	3.459	3.37234	3.43036	3.52669	3.45585	3.65567	3.3401	3.35933	3.25208	3.52524	3.46813	3.32117	3.49366	3.19618	3.27626	3.32742	3.48313	3.39425	3.35239	3.23488	3.54561	2.94083	3.37684	3.50976
C3_CD8-SLC4A10	2.82168	2.52599	2.7792	2.45994	2.69712	2.75721	2.91492	2.64819	2.35961	2.52146	2.57328	2.51858	2.72286	2.45472	2.65627	2.72459	2.57844	2.54563	2.44005	2.39896	2.72856	2.65453	2.49411	2.45363	2.58238	2.57125	2.41311	2.80013	2.78388	2.70197	2.78209	2.41074	2.66312	2.47709	2.75724	2.71817	2.50996	2.70418	2.47731	2.74926	2.604	2.71548	2.75901	2.7317	2.422	2.72135	2.17595	2.58731	2.81467
C4_CD8-LAYN	4.55685	4.12871	4.45069	4.09531	4.18865	4.32187	4.40327	4.41745	3.86898	4.29844	4.14808	4.1981	4.30621	4.02218	4.19844	4.23704	4.08589	4.27115	4.13189	3.98089	4.29787	4.172	4.01968	4.01221	4.11998	4.35926	4.05826	4.34625	4.25158	4.46544	4.51501	4.173	4.12159	4.04419	4.28583	4.22758	4.10719	4.20387	3.9975	4.19422	4.24825	4.26378	4.26507	4.20701	4.09891	4.21572	3.80116	4.18215	4.33554
C6_CD4-CCR7	3.23868	3.1154	3.19198	2.95982	3.10151	3.28338	3.43157	3.04353	2.92052	2.88482	3.17677	3.01329	3.30455	3.04499	3.17948	3.33754	3.1421	2.87401	2.99641	3.03446	3.17797	3.17016	2.96755	3.02176	3.04213	3.01721	3.11803	3.32079	3.30666	3.21917	3.21408	3.03278	3.18358	2.98269	3.24114	3.20599	3.05793	3.24267	2.93057	3.21641	3.03106	3.19417	3.25756	3.23106	2.95464	3.30416	2.74462	3.14049	3.30105
C7_CD4-FOXP3	3.0248	2.81265	2.92375	2.58769	2.82577	2.92507	3.05927	2.88388	2.472	2.80514	2.77505	2.73856	2.91064	2.62418	2.80289	2.79539	2.6556	2.60423	2.57301	2.58807	2.82179	2.73471	2.56044	2.57383	2.69716	2.88767	2.67887	2.96833	2.83177	3.02036	3.036	2.79315	2.72178	2.70791	2.82421	2.76907	2.72479	2.81072	2.63964	2.85002	2.90522	2.79346	2.82909	2.79441	2.6729	2.76465	2.488	2.74911	2.97373
C8_CD4-CTLA4	6.37316	6.04674	6.25229	5.87954	6.03964	6.21862	6.29437	6.24547	5.74362	6.11358	6.04148	6.02019	6.13431	5.87736	6.05885	6.06533	5.93514	6.0233	5.95733	5.90064	6.11613	6.01229	5.82992	5.77347	5.96761	6.19642	5.90192	6.20712	6.05774	6.3145	6.37185	6.02965	5.94866	5.93593	6.14114	6.05726	5.97966	6.01952	5.89258	6.0579	6.18652	6.06377	6.10713	6.03916	5.91522	6.0633	5.65426	6.03124	6.1943
[truncated: 372 more columns]
